# A recently formed triploid *Cardamine insueta* inherits leaf vivipary and submergence tolerance traits of parents

1 Running title: Parental legacies in contemporary triploid

2

3 **Jianqiang Sun**<sup>1§</sup>, **Rie Shimizu-Inatsugi**<sup>2§</sup>, **Hugo Hofhuis**<sup>3</sup>, **Kentaro Shimizu**<sup>4</sup>, **Angela Hay**<sup>3</sup>,  
4 **Kentaro K. Shimizu**<sup>2,5\*</sup>, **Jun Sese**<sup>6,7\*</sup>

5

6 <sup>1</sup>Research Center for Agricultural Information Technology, National Agriculture and Food Research  
7 Organization, 3-1-1 Kannondai, Tsukuba, Ibaraki, 305-8517, Japan

8 <sup>2</sup>Department of Evolutionary Biology and Environmental Studies, University of Zurich,  
9 Winterthurerstrasse 190, CH-8057, Zurich, Switzerland

10 <sup>3</sup>Max Planck Institute for Plant Breeding Research, Germany

11 <sup>4</sup>Department of Biotechnology, Graduate School of Agricultural and Life Sciences, The University of  
12 Tokyo, Tokyo, 113-8657, Japan

13 <sup>5</sup>Kihara Institute for Biological Research (KIBR), Yokohama City University, 641-12 Maioka,  
14 Totsuka-ward, Yokohama, 244-0813, Japan

15 <sup>6</sup>Artificial Intelligence Research Center, National Institute of Advanced Industrial Science and  
16 Technology, 2-3-26 Aomi, Koto-ku, Tokyo 135-0064, Japan

17 <sup>7</sup>Humanome Lab, Inc., L-HUB 3F, 1-4, Shumomiyabi-cho, Shinjuku, Tokyo, 162-0822, Japan

18 §equal contributions

19 \* **Correspondence:**

20 Kentaro Shimizu

21 Jun Sese

22 Keywords: allopolyploid, homeolog, RNA-Seq, meristem formation, ecological niche

## 23 **Abstract**

24 Contemporary speciation provides a unique opportunity to directly observe the traits and  
25 environmental responses of a new species. *Cardamine insueta* is an allotriploid species that appeared  
26 within the past 150 years in a Swiss village, Urnerboden. In contrast to its two progenitor species, *C.*  
27 *amara* and *C. rivularis* that live in wet and open habitats, respectively, *C. insueta* is found in-between  
28 their habitats with temporal water level fluctuation. This triploid species propagates clonally and  
29 serves as a triploid bridge to form higher ploidy species. Although niche separation is observed in  
30 field studies, the mechanisms underlying the environmental robustness of *C. insueta* are not clear. To  
31 characterize responses to a fluctuating environment, we performed a time-course analysis of  
32 homeolog gene expression in *C. insueta* in response to submergence treatment. For this purpose, the  
33 two parental (*C. amara* and *C. rivularis*) genome sequences were assembled with a reference-guided  
34 approach, and homeolog-specific gene expression was quantified by using HomeoRoq software. We  
35 found that *C. insueta* and *C. rivularis* initiated vegetative propagation by forming ectopic meristems  
36 on leaves, while *C. amara* did not. We examined homeolog-specific gene expression of three species  
37 at nine time points during the treatment. The genome-wide expression ratio of homeolog pairs was  
38 2:1 over the time-course, consistent with the ploidy number. By searching the genes with high  
39 coefficient of variation of expression over time-course transcriptome data, we found many known  
40 key transcriptional factors related to meristem development and formation upregulated in both *C.*  
41 *rivularis* and *rivularis*-homeolog of *C. insueta*, but not in *C. amara*. Moreover, some *amara*-  
42 homeologs of these genes were also upregulated in the triploid, suggesting trans-regulation. In turn,  
43 Gene Ontology analysis suggested that the expression pattern of submergence tolerant genes in the  
44 triploid was inherited from *C. amara*. These results suggest that the triploid *C. insueta* combined  
45 advantageous patterns of parental transcriptomes to contribute to its establishment in a new niche  
46 along a water-usage gradient.

47

## 48 **1 Introduction**

49 The molecular basis of speciation has been a central question in biology (Jerry A and H. Allen,  
50 2004). Little is known still about how a new species obtains new traits to adapt to a distinct  
51 environment. A major obstacle in studying this is that most speciation events occurred in the past,

52 and thus the traits and the environment at the time of speciation are not directly observable. The  
53 difference in traits and environments between current species may represent evolution after  
54 speciation rather than the changes that occurred at speciation. A unique opportunity to study  
55 speciation in action is contemporary allopolyploid speciation (Soltis and Soltis, 2009; Abbott et al.,  
56 2013). During the past 150 years, several cases of polyploid speciation have been documented, for  
57 example in *Tragopogon*, *Senecio*, *Mimulus*, *Spartina*, and *Cardamine* (Urbanska et al., 1997; Abbott  
58 and Andrew, 2004; Ainouche et al., 2004; Soltis et al., 2004). Because polyploid speciation  
59 immediately confers complete or partial reproductive isolation between the new polyploid and  
60 progenitor species, a new polyploid species must establish and propagate while surrounded by  
61 individuals with different ploidy. To overcome this situation termed "minor cytotype disadvantage",  
62 two traits are suggested to facilitate establishment (Comai, 2005). First, the distinct environmental  
63 niche of a polyploid species would reduce competition with progenitor species. Second, clonal  
64 vegetative propagation or self-fertilization would assure the persistence of new polyploids at the  
65 initial stages because meiotic abnormality is common in newly formed polyploid species. This would  
66 be critical for odd-ploidy species including triploids, which often contribute to the formation of  
67 higher polyploids via a so-called triploid bridge (Bretagnolle and Thompson J. D., 1995; Ramsey and  
68 Schemske, 1998; Mable, 2003; Husband, 2004; Tayalé and Parisod, 2013; Mason and Pires, 2015).  
69 Despite the significance of these traits, the underlying molecular mechanisms are yet to be studied.

70 The contemporary polyploid *C. insueta* belongs to the genus *Cardamine*, which has long been  
71 studied for ecological polyploid speciation (Howard, 1948; Hussein, 1948), and represents adaptive  
72 radiation by recurrent polyploidization along water-usage gradients (Shimizu-Inatsugi et al., 2016;  
73 Akiyama et al., 2019). A major advantage to studying *Cardamine* is that it is closely related to the  
74 model plant *Arabidopsis thaliana*, and a reference genome assembly of *Cardamine hirsuta* (Gan et  
75 al., 2016) is publicly available, thus functional and genomic data of these model species are readily  
76 available. One allotriploid species in *Cardamine*, *C. insueta* ( $2n = 3x = 24$ ; RRA), is a textbook  
77 example of contemporary speciation discovered by Urbanska and Landolt in 1974 (Urbanska-  
78 Worytkiewicz and Landolt, 1974b). It was formed by the hybridization of two progenitor diploids  
79 *Cardamine amara* ( $2n = 2x = 16$ ; AA) and *Cardamine rivularis* ( $2n = 2x = 16$ ; RR, belonging to *C.*  
80 *pratensis* complex sensu lato) approximately 100–150 years ago at the valley of Urnerboden in the  
81 Swiss Alps (Urbanska-Worytkiewicz and Landolt, 1972; Urbanska-Worytkiewicz and Landolt, 1974b;  
82 Urbanska et al., 1997; Mandáková et al., 2013; Zozomová-Lihová et al., 2014) (**Fig. S1A**). The two  
83 diploid progenitors have distinct ecological habitats. While *C. amara* grows in and beside water

84 streams, *C. rivularis* inhabits slightly moist sites, avoiding permeable and fast drying soil (Urbanska-  
85 Worytkiewicz and Landolt, 1974b, 1974a) (**Fig. S1B**). Around the end of the 19th to the early 20th  
86 centuries, the deforestation and land-use conversion to grazing induced the hybridization of these two  
87 diploids to produce the triploid species *C. insueta*, which is abundant in manured hay-meadows  
88 (Urbanska-Worytkiewicz and Landolt, 1972; Urbanska et al., 1997; Mandáková et al., 2013).  
89 Cytogenetic studies suggested that *Cardamine insueta* served as a triploid bridge in the formation of  
90 pentaploid and hexaploid *C. schulzii* by the further hybridization with autotetraploid *C. pratensis*  
91 (sensu stricto,  $2n = 2x = 30$ ; PPPP; hypotetraploid derived from a chromosomal fusion) in  
92 Urnerboden (Mandáková et al., 2013).

93 The propagation of triploids mainly depends on vegetative propagation for two reasons, high male  
94 sterility *per se* and hay cutting and grazing in flowering season (Urbanska et al., 1997). One of the  
95 progenitor species, *C. rivularis*, can produce plantlets on the surface of leaves and nodes by ectopic  
96 meristem formation, which is a common feature of the *C. pratensis* complex (Smith, 1825; Salisbury,  
97 1965; Dickinson, 1978). This characteristic is inherited by *C. insueta*, enabling it to be a dominant  
98 species at the site despite its ploidy level (Urbanska-Worytkiewicz and Landolt, 1974a; Urbanska et  
99 al., 1997). This type of leaf vivipary is only found in a limited number of angiosperms and assumed  
100 to contribute to population establishment in polyploids (Dickinson, 1978). In this sense, the trait of  
101 leaf vivipary can be considered a key factor for the establishment of this triploid.

102 Another interesting aspect of *C. insueta* establishment is its ecological niche shift relative to its  
103 progenitor species. Genus *Cardamine* is known to include many submergence tolerant species  
104 including *C. amara* (Shimizu-Inatsugi et al., 2016; Akiyama et al., 2019). An allotetraploid *C.*  
105 *flexuosa*, derived from *C. amara* and *C. hirsuta* diploid progenitors, was shown to inherit parental  
106 traits and be successful in a wider soil moisture range (Shimizu-Inatsugi et al., 2016; Akiyama et al.,  
107 2019). The transcriptomic response of *C. flexuosa* to submergence or drought stress was shown to be  
108 combined although attenuated compared to its progenitor species, which could confer the wider  
109 tolerance found in the polyploid. Even though the niche separation between *C. rivularis* and *C.*  
110 *insueta* is not yet clearly illustrated, our field observations are consistent with this hypothesis.

111 In this study, we focused on the time-course gene expression pattern of the triploid *C. insueta* and its  
112 two diploid progenitors during submergence treatment, which induces both water stress and ectopic  
113 meristem formation on leaves. To study the time-course data of homeologs, we employed  
114 bioinformatic methods of variably expressed genes because data points of a time-course are not

115 independent and serve partly as replicates (Yamaguchi et al., 2008; Shin et al., 2014). Here we  
116 combined the time course analysis with subgenome-classification bioinformatic workflow of  
117 HomeoRoq (Akama et al., 2014), and detected variably expressed homeologs (VEH) during the  
118 treatment. We address the following specific questions:

119 (1) What is the expression rate and the ratio of homeologous genes in triploid species in response to  
120 submergence, either genome-wide or between each homeologous gene pair?

121 (2) Which gene ontology categories are enriched in VEH? Do they reflect the phenotypic trait of each  
122 progenitor species or the triploid? How does *C. insueta* combine the expression patterns of the two  
123 progenitors?

## 124 **2 Materials and Methods**

### 125 **2.1 Plant materials and RNA sequencing**

126 *Cardamine insueta*, *C. amara*, and *C. rivularis* plants used in this study were collected from  
127 Urnerboden. All plants were grown together in a plant cultivation room with 16 hr light and 8 hr dark  
128 cycle. The plants were planted in single pots, placed on trays, and watered from below.

129 Submergence treatment was started in the morning at 07:00. Two mature leaves were detached and  
130 submerged in water. We isolated RNA from the floating leaflets of the three species at nine time  
131 points after the start of submergence treatment (0 hr, 2 hr, 4 hr, 8 hr, 12 hr, 24 hr, 48 hr, 72 hr, and 96  
132 hr) using Qiagen RNeasy kit (Qiagen, Maryland, U.S.A.). RNA quality was assessed by Bioanalyser  
133 Nanochip (Agilent, Santa Clara, U.S.A.) and libraries quantified by Qubit (ThermoFisher, Waltham,  
134 U.S.A.). In total 27 libraries (3 species x 9 time points) were prepared according to NEBNext Ultra™  
135 Directional RNA Library Prep Kit for Illumina (New England Biolabs, Ipswich, U.S.A.) followed by  
136 paired end sequencing (100bp x 2) on a HiSeq2000 with a HiSeq Paired-End Cluster Generation Kit  
137 and HiSeq Sequencing Kit (Illumina, San Diego, U.S.A.). Trimmomatic (ver. 0.36) (Bolger et al.,  
138 2014) was used for discarding the low-quality reads with parameters of “PE -threads 4 -phred33  
139 ILLUMINACLIP:adapters.fa:2:30:10 LEADING:20 TRAILING:20 SLIDINGWINDOW:4:20  
140 MINLEN:50”.

### 141 **2.2 Reference sequence assembly**

142 The reference sequences of A-genome and R-genome were assembled by SNP substitution at coding  
143 regions from the *C. hirsuta* genome (Gan et al., 2016) with the following steps. To assemble the  
144 reference sequence of A-genome, first, we pooled all RNA-Seq reads of the nine RNA-Seq samples  
145 of *C. amara*. Second, we mapped the reads onto the reference sequence (i.e., H-genome) using STAR  
146 (ver. 2.3.0e) (Dobin et al., 2013). Third, we detected single-nucleotide polymorphisms (SNPs) and  
147 short indels from the mapping result using samtools (ver. 0.1.18) (Li et al., 2009). SNPs and indels.  
148 were defined as the polymorphic loci where at least 80% of reads have the alternative nucleotides.  
149 Fourth, we replaced the nucleotides on the reference with the alternative nucleotides, if the  
150 alternative nucleotide was covered by at least five reads. Finally, the gene annotations of the  
151 assembled sequence were converted from the H-genome annotations with the replacement  
152 information. To improve the accuracy of sequence, we used the assembled sequence as a reference  
153 sequence, and repeated steps two through five, nine times. The resulting A-genome was used for the  
154 mapping of individual RNA-seq data from all three species. The R-genome was also reconstructed  
155 with the same protocol. As a result, 1,496,561 and 1,484,186 SNP regions on the H-genome were  
156 replaced for *C. amara* and *C. rivularis*, respectively.

### 157 **2.3 Evaluation of HomeoRoq classification confidence using diploids**

158 We used HomeoRoq (ver. 2.1) (Akama et al., 2014) to classify genomic origins of homeolog-specific  
159 reads in the nine *C. amara* and *C. rivularis* samples. Following the HomeoRoq pipeline, for each *C.*  
160 *amara* sample, we used STAR to map reads onto the A-genome and R-genome and used HomeoRoq  
161 to classify reads as *A-origin*, *R-origin*, and *unclassified*. Then, we calculated the percentage of  
162 misclassified reads (i.e., the reads that were classified as *R-origin*). Similarly, we used HomeoRoq to  
163 calculate the percentage of misclassified reads (i.e., the reads that were classified as *A-origin*) in each  
164 *C. rivularis* sample.

### 165 **2.4 Homeolog expression quantification and A-origin ratio definition of triploid**

166 We used HomeoRoq to analyze the nine *C. insueta* samples. For each *C. insueta* sample, we used  
167 STAR to map reads onto A-genome and R-genome and used HomeoRoq to classify reads as *A-*  
168 *origin*, *R-origin*, and *unclassified*. Then, we customized HTSeq (Planet et al., 2012) to count the  
169 number of read pairs that mapped on homeolog region for *A-origin*, *R-origin*, and *unclassified* reads  
170 of each *C. insueta* sample separately. In the customized HTSeq, if a read mapped on the region  
171 overlapped by multiple homeologs, a read was divided by the number of homeologs.



172 To calculate the number of fragments per kilobase mapped (FPKM) for *C. insueta* samples (IA and IR  
173 samples), we first allocated the *unclassified* reads into *A-origin* and *R-origin* reads with A-origin  
174 ratio. A-origin ratio of homeolog *h* at the time point *s* was defined as  $p_h^s = a_h^s / (a_h^s + r_h^s)$ , where  $a_h^s$   
175 and  $r_h^s$  are the numbers of *A-origin* and *R-origin* reads of homeolog *h* at the time point *s*,  
176 respectively. Thus, the number of *A-origin* reads after *unclassified* reads allocation ( $a_h^{\prime s}$ ) was  
177 calculated as  $a_h^{\prime s} = a_h^s + u_h^s p_h^s$ , where  $u_h^s$  is the number of *unclassified* reads of homeolog *h* in  
178 sample *s*. Similarly,  $r_h^{\prime s} = a_h^s + u_h^s (1 - p_h^s)$  for *R-origin* reads. Then, FPKM of *A-origin* reads of  
179 homeolog *h* in sample *s* was calculated as  $10^9 a_h^{\prime s} / (L_h^A A^s)$ , where  $L_h^A$  is the length of homeolog *h* on  
180 A-genome and  $A^s$  is the total number of *A-origin* reads in sample *s*; likewise, FPKM of *R-origin*  
181 reads was calculated as  $10^9 a_h^{\prime s} / (L_h^R R^s)$ , where  $L_h^R$  is the length of homeolog *h* on R-genome and  $R^s$   
182 is the total number of *R-origin* reads in sample *s*.

183 In addition, FPKM of progenitors were calculated from the total number of reads (i.e.,  $a_h^s + u_h^s +$   
184  $r_h^s$ ). Therefore, FPKM of *C. amara* and *C. rivularis* were calculated as  $10^9 (a_h^s + u_h^s + s_h^s) / (L_h^A A^s)$   
185 and  $10^9 (a_h^s + u_h^s + s_h^s) / (L_h^R R^s)$ , respectively.

## 186 **2.5 Expressed homeologs and PCA analysis**

187 An expressed homeolog was defined as a homeolog with FPKM > 1.0. A homeolog expressed in a  
188 sample (i.e., either *amara*-derived in *C. insueta* (IA), *rivularis*-derived in *C. rivularis* (IR), *C. amara*  
189 or *C. rivularis*) was defined as a homeolog with FPKM > 1.0 at least at one of the nine time points. In  
190 total, 21,131 homeologs were expressed at least in one sample. PCA was performed against log<sub>10</sub>-  
191 transformed FPKM of these 21,131 expressed homeologs. To avoid calculating log<sub>10</sub>0, the log<sub>10</sub>-  
192 transformed FPKM was truly calculated as log<sub>10</sub>(FPKM + 1).

## 193 **2.6 Identification of variably expressed homeologs (VEH) and Gene ontology (GO)** 194 **enrichment analysis**

195 Mean and coefficient of variation (CV) were calculated from log<sub>10</sub>-transformed FPKM over the nine  
196 time points. VHE was defined as an homeolog satisfied the mean > 1.0 and the CV > 0.20. We  
197 identified from IA, IR, *C. amara*, and *C. rivularis* samples, separately.

198 Gene ontology (GO) enrichment analysis was performed for the four variably expressed homeolog  
199 (VEH) sets with R packages clusterProfiler (ver. 3.12.0) and org.At.tair.db (ver. 3.8.2) (Yu et al.,  
200 2012). To remove redundancies of GO categories, only GO categories which are associated with 10–

201 500 *Cardamine* homeologs and below the third level in the GO category hierarchy were used. The  
202 threshold FDR = 0.1 was used for cutoff of significantly enriched GO categories.

203

## 204 **3 Results**

### 205 **3.1 Plantlet induction on *C. insueta* and *C. rivularis* leaves by submergence**

206 At the field of Unerboden valley, we could scarcely observe normal seed setting on *C. insueta*, but  
207 small plantlets on leaves were frequently observed after flowering, as described previously  
208 (Urbanska, 1977). We also observed small plantlets on the leaves of *C. rivularis*. In contrast, *C.*  
209 *amara* does not form plantlets on leaves, rather adventitious roots and shoots were formed from  
210 rhizomes. In the natural habitat, the plantlet formation of *C. rivularis* and *C. insueta* can be seen at  
211 flowering to post-flowering season (Salisbury, 1965; Urbanska, 1977). It was also reported that *C.*  
212 *pratensis* (which is closely related to *C. insueta* or considered the same species) tend to bear more  
213 plantlets on the leaves in damper sites than in drier sites (Salisbury, 1965), implying that high  
214 moisture could be the trigger for meristem formation. Thus, we tested plantlet induction by  
215 submergence treatment using dissected leaves with this trio of species in the lab. We detached mature  
216 leaves from mother plants propagated in a climate chamber and floated the leaves on water. Within  
217 16 h, we observed the activation of dormant shoot meristems and initiation of ectopic root meristems,  
218 which formed visible plantlets on *C. rivularis* leaves 96 hours after submergence (**Fig. S2, Dataset**  
219 **S1**). Induction of ectopic plantlets followed a similar time-course in *C. insueta*. In contrast, plantlet  
220 induction was not observed on the leaves of *C. amara*. In addition, during the 96-hr treatment, no  
221 symptoms of necrosis appeared on any of the leaves, suggesting that all three species have some  
222 submergence tolerance for at least 96 hr.

### 223 **3.2 Gene annotation on the two diploid progenitor reference sequences**

224 To detect how homeologous genes are expressed in plantlet induction and submergence treatment,  
225 we harvested time-course RNA-Seq samples of *C. insueta* and diploid progenitor leaves at nine time  
226 points after initial submergence (i.e., 0, 2, 4, 8, 12, 24, 48, 72, and 96 hr) (**Fig. S3A**). We harvested  
227 the first lateral leaflet pair in young leaves with no ectopic plantlets. To quantify homeolog-specific  
228 gene expression, we assembled the genomes of *C. amara* (A-genome) and *C. rivularis* (R-genome),  
229 respectively, using the same pipeline of a reference-guided approach using RNA-Seq reads (**Fig.**



230 **S3B**). The genome sequence of a close relative, *C. hirsuta* (H-genome) (Gan et al., 2016), was used  
231 as a reference. The A-genome structure is reported to be almost perfectly collinear with that of H-  
232 genome, except for one pericentric inversion at chromosome 1, by cytological studies (Mandáková et  
233 al., 2013, 2014). The genome structures of the A-genome and R-genome are also similar to each  
234 other (Mandáková et al., 2013). The length of assembled reference sequences of A-genome and R-  
235 genome are 198,651,635 and 198,654,862 nucleotides, respectively, which are nearly the same as the  
236 length of the original H-genome (198,654,690 nucleotides). We also annotated the orthologous genes  
237 of *C. amara* and *C. rivularis* according to the information of *C. hirsuta* H-genome. In total, we found  
238 23,995 and 24,115 genes covered by at least one read among the nine time points on the assembled  
239 A-genome and R-genome, respectively. These gene sets, which correspond to 81.5% and 81.7% of  
240 29,458 genes in H-genome, respectively, were defined as expressed and used for the following  
241 analysis.

### 242 **3.3 Expression ratio from each subgenome is consistent with the number of chromosomes**

243 We applied the HomeoRoq analysis pipeline (Akama et al., 2014) to classify the origin of each RNA-  
244 seq read of *C. insueta* samples to either *A-origin* (i.e., the genomic origin of the read is A-  
245 subgenome) or *R-origin* (**Fig. S3C**). After filtering for read quality, 10.6 million read pairs on  
246 average among the nine samples could be classified as homeolog-specific read pairs (**Dataset S2**). Of  
247 the total homeolog-specific read pairs in the *C. insueta* 0 hr sample, 27.3% and 56.7% of read pairs  
248 were classified as *A-origin* and *R-origin*, respectively. The remaining 16.0% of read pairs could be  
249 classified to neither *A-origin* nor *R-origin* (*unclassified*) due to the lack of SNPs or the identical  
250 sequence on the correspondence region. As a whole genome, the ratio of *A-origin* to *R-origin* reads  
251 was approximately 1:2. When we analyzed all samples from the other eight time points, we observed  
252 a slight increase in the proportion of *A-origin* reads in correlation with the time point, from 1:2.07 at  
253 0 hr to 1:1.90 at 96 hr (**Dataset S2**). Instead of this minor transition, the expression ratio between  
254 subgenomes remained A:R  $\approx$  1:2 with *C. insueta* samples at all time points, indicating that the  
255 expression ratio from each subgenome is consistent with the number of chromosome regardless of  
256 the submergence treatment.

### 257 **3.4 Most homeolog pairs were expressed in proportion to the subgenomes in *C. insueta***

258 To investigate the proportion of expression levels of homeolog pairs in *C. insueta*, we quantified the  
259 expression level of each homeolog pair at each time point. We found that (i) the correlation between

260 the expression levels of homeolog pairs was higher than 0.81 at any time point (**Fig. 1A and Fig. S4**).  
261 However, (ii) the expression levels of most homeologs expressed from the A-subgenome (A-  
262 homeolog) were approximately half that of R-homeologs. To understand the proportion of expression  
263 levels of homeolog pairs in detail, we calculated A-origin ratio—the proportion of A-homeolog  
264 expression level to the total A-homeolog and R-homeolog expression levels—for all homeolog pairs  
265 at each time point. We found that the distribution of A-origin ratios had a gentle peak at the position  
266 of 0.33 at all time points (**Fig. 1B and Fig. S5**). This result suggests the expression ratio of the  
267 majority of homeolog pairs is consistent with the copy number, i.e. the subgenome-set numbers of  
268 the triploid. In addition, we found two sharp peaks at both edges, the positions of 0.0 and 1.0, of A-  
269 origin ratio, which represent the homeologs only expressed in of either subgenome.

270 Additionally, to investigate whether the A-origin ratio changes during the submergence treatment, we  
271 compared the A-origin ratio distributions between different time points. The patterns of all time  
272 points were correlated to each other, with the least coefficient (0.66) between 0 hr and 2 hr (**Fig. 1B**  
273 **and Table S1**). This result indicates that A-origin ratios did not change drastically in most homeolog  
274 pairs by the submergence treatment, but a limited number of homeolog pairs change the expression  
275 balance.

### 276 **3.5 The whole genome expression pattern of each *C. insueta* subgenome is closer to that of its** 277 **progenitor genome**

278 To gain an overview of how homeologous gene expression varies at the whole genome level among  
279 *C. insueta* and the progenitor species *C. amara* and *C. rivularis*, we conducted principal component  
280 analysis (PCA). PCA was performed against the log<sub>10</sub>-transformed FPKM of 21,131 expressed  
281 homeologs (**Fig. 2**). We found that the first principal component (PC1) grouped samples into two  
282 groups: the one with A-homeologs of *C. insueta* (*I<sub>A</sub>*) and *C. amara* (*A*) samples and the other with R-  
283 homeologs of *C. insueta* (*I<sub>R</sub>*) and *C. rivularis* (*R*) samples. In addition, we also found that the second  
284 principal component (PC2) grouped samples into two groups: one consisting of polyploid samples (*I<sub>A</sub>*  
285 and *I<sub>R</sub>* samples, lower side of **Fig. 2A**) and the other consisting of diploid samples (*A* and *R* samples,  
286 upper side of **Fig. 2A**). By PC1 and PC2, the samples were grouped into four clusters according to  
287 the subgenome type. In contrast, by PC2 and the third principal component (PC3), we observed the  
288 transition according to the treatment time, showing a characteristic transition from 0 to 12 hr, and the  
289 recurrence of 24, 48, 72 and 96 hr samples towards 0 hr samples in each subgenome, which might  
290 reflect the combined effect of submergence stress and circadian rhythm (**Fig. 2B**). The result of PC1

291 suggests that the majority of the homeologs of  $I_A$  and  $I_R$  should retain a similar expression pattern to  
292 each parent,  $A$  and  $R$ . When we focus on PC2, the distance between  $R$  and  $I_R$  is slightly closer than  
293 that between  $A$  and  $I_A$ . This might reflect the difference in the number of subgenome sets in the  
294 triploid,  $A:R=1:2$ , implying a stronger effect from the pattern with more subgenome sets.

### 295 **3.6 VEHs related to submergence and their GO enrichment analysis**

296 To understand the difference among species in plantlet formation on the leaf and in submergence  
297 response, we focused on the homeologs with a higher expression change during the treatment.  
298 Standard tools to identify differentially expressed genes between different conditions are not directly  
299 applicable to time-course data, in which expression levels of neighboring time points may be highly  
300 correlated. We defined variably expressed homeologs (VEHs) according to the coefficient of  
301 variation (CV) among the expression levels of the nine time points, since CV is used for identifying  
302 variably expressed genes in various studies involving time-course analysis (Czechowski et al., 2005;  
303 Yamaguchi et al., 2008; Shin et al., 2014; Zhao et al., 2017). We identified 1,194, 1,144, 1,030, and  
304 1,063 VEHs from  $I_A$ ,  $I_R$ ,  $A$  and  $R$  genome/subgenome with the cutoff  $CV > 0.2$  throughout the  
305 treatment, respectively (**Dataset S3**). We visualized the patterns by focusing on two genes that were  
306 expected to be affected (**Fig. S6**). The genes associated with ethylene-response such as *ERF1*  
307 (AT3G23240) (Chao et al., 1997; Solano et al., 1998) and circadian rhythm such as *CCA1*  
308 (AT2G46830) (Alabadí et al., 2001) were identified as VEHs in all samples, which should reflect the  
309 ethylene-response to submergence and circadian rhythm response, respectively. The expression  
310 pattern of these two homeologs were similar among all four VEH sets from  $I_A$ ,  $I_R$ ,  $A$  and  $R$  (**Fig. S6**).  
311 In addition to these common VEHs, we also found more homeologs identified as VEHs only in one  
312 to three samples (**Fig. S7**).

313 To investigate the biological processes of VEH sets of  $I_A$ ,  $I_R$ ,  $A$  and  $R$ , we performed gene ontology  
314 (GO) enrichment analysis against the four VEH sets (**Table 1, Dataset S4**). The numbers of enriched  
315 GO categories were 146, 155, 160, and 181, respectively for  $I_A$ ,  $I_R$ ,  $A$  and  $R$ . A value of negative  
316  $\log_{10}(q\text{-value})$  more than 1 was defined as significant, and a higher value indicates stronger  
317 enrichment. We found that some of the GO categories related to water stress, including GO:0006066  
318 (alcohol metabolic process), GO:0009723 (response to ethylene) and GO:0009414 (response to water  
319 deprivation), were enriched in all four VEH sets (**Table 1**). As gas diffusion rates are restricted under  
320 water, submergence of plants induces ethylene accumulation and low oxygen availability, which  
321 could result in the reorganization of the ethylene-response pathway and fermentation pathway (e.g.

322 anaerobic respiration and alcohol metabolism). The enriched categories GO:0006066 and  
323 GO:0009723 indicate that *I<sub>A</sub>*, *I<sub>R</sub>*, *A*, and *R* all respond to ethylene and hypoxia signals with the  
324 submergence treatment. Two alcohol related categories (GO:0006066 alcohol metabolic process and  
325 GO:0046165 alcohol biosynthetic process) were more strongly enriched in *A* and *I<sub>A</sub>*, which was two  
326 orders of magnitude higher than *I<sub>R</sub>* and *R* (>2 difference in negative log<sub>10</sub>(*q*-value) in **Table 1**). In  
327 addition, GO:0009414 (response to water deprivation), which encompasses the expression changes of  
328 aquaporin genes and ethylene-responsive genes (**Dataset S5**), was enriched.

329 In contrast, some GO categories related to submergence stress were only above the significance  
330 threshold in part of the four VEH sets with various combinations (**Table 1**). The two categories  
331 related to ethylene metabolism, GO:0009873 (ethylene-activated signaling pathway) and  
332 GO:0071369 (cellular response to ethylene stimulus), were not detected in *I<sub>R</sub>* but all other three. All  
333 these ethylene related GO categories were most strongly enriched in *A*, suggesting larger number of  
334 genes are detected than other VEH sets. In addition, the categories related to abscisic acid signaling,  
335 which is known to work antagonistically to ethylene, GO:0009738 (abscisic acid-activated signaling  
336 pathway) and GO:0071215 (cellular response to abscisic acid stimulus), were also detected only in *A*  
337 with many inactivated genes by treatment. In contrast, the categories related to oxidative stress  
338 showed the strongest enrichment in *R* than others, suggesting higher intensity of oxidative stress in *C.*  
339 *rivularis* than other species.

340

### 341 **3.7 VEHs related to meristem and their GO enrichment analysis**

342 Among the GO categories enriched in four VEH sets, three categories were related to meristem  
343 activity: GO:0035266 (meristem growth), GO:0010075 (regulation of meristem growth), and  
344 GO:0048509 (meristem development) (**Table 1**). They were enriched only in VEH sets of *I<sub>A</sub>* and *I<sub>R</sub>*,  
345 but not in *A* and *R*, although *C. rivularis* can also produce ectopic meristems.

346 We analyzed the expression pattern of several known transcriptional factors which could be involved  
347 in ectopic meristem formation and development in *Cardamine* (**Fig. 3** and **Fig. S8**). Class I Knotted1-  
348 like homeobox (KNOX) transcription factors function to maintain shoot apical meristem activity in  
349 many different plant species (Vollbrecht et al., 1991; Long et al., 1996; Hay and Tsiantis, 2010).  
350 Importantly, the overexpression of *SHOOTMERISTEMLESS* (*STM*) and another KNOX gene,  
351 *Arabidopsis knotted 1*-like gene (*KNAT1*) are known to cause ectopic meristem formation on the leaf

352 in *A. thaliana* (Chuck et al., 1996; Williams, 1998). Moreover, an *STM* ortholog is required for leaf  
353 vivipary in *Kalanchoë daigremontiana* (Garcês et al., 2007), a clonal propagation trait that is also  
354 observed in *C. rivularis* and *C. insueta*. As summarized in Fig. 3, orthologs of the four *A. thaliana*  
355 *KNOXI* genes, *STM*, *KNAT1*, *KNAT2* and *KNAT6*, showed upregulated expression in all or any of *I<sub>A</sub>*,  
356 *I<sub>R</sub>* and *R*, but not in *A*. In addition, we also found that *PDF1* increased expression levels in *C. insueta*  
357 (both *I<sub>A</sub>* and *I<sub>R</sub>*) and *R*, which is exclusively detected in the L1 layer of shoot apical meristem  
358 throughout the shoot development of *Arabidopsis* (Abe et al., 1999). Three other transcription factor-  
359 encoding genes, *CUC2*, *CUC3* and *LAS*, which contribute to ectopic shoot apical meristem in tomato  
360 leaves (Rossmann et al., 2015), were induced in *R* and *I<sub>R</sub>* but not in *A*.

361 The expression of genes related to root apical meristem maintenance and formation showed similar  
362 patterns to those related to shoot apical meristem formation. Transcription factors with an AP2/ERF  
363 domain for the maintenance of root apical meristem (*PLT1*, *PLT2* and *PLT3*; (Drisch and Stahl,  
364 2015)), were scarcely expressed in *A* but induced in others. For genes with similar function, *SHR* and  
365 *SCR*, expression level of *SHR* was increased in all four sets, while that of *SCR* was upregulated only  
366 temporarily and reverted in 24 hr. The expression of *WOX5*, a key factor to maintain the root stem  
367 cell (Sarkar et al., 2007), was very low in all sets, most probably due to the extremely limited  
368 expression area only at the quiescent center.

369 Many of the above-mentioned transcription factors contributing to meristem formation and  
370 maintenance are known to be related to or controlled by auxin, thus the transportation of auxin might  
371 be also involved in ectopic meristem development in *C. insueta* and *C. rivularis*. One of the auxin  
372 transporter genes, *PIN1* was induced by the treatment in all four sets soon after the start of  
373 submergence, but after 24 hr the high expression level was only retained in *I<sub>A</sub>*, *I<sub>R</sub>*, and *R*. On the other  
374 hand, the other auxin transporter genes *PIN3*, *PIN4*, and *PIN7* were temporarily induced by the  
375 treatment, but soon decreased among all sets. The peaks of expression of these three genes were at 4–  
376 12 hr in *A*, 12–24 hr in *R*, and 8–24 hr in *I<sub>A</sub>* and *I<sub>R</sub>*, suggesting involvement in meristem formation  
377 and development. By the VEH enrichment analysis, GO:0060918 (auxin transport) and GO:0009926  
378 (auxin polar transport) were enriched in *I<sub>A</sub>* and *I<sub>R</sub>*. In contrast, the other two auxin related GO  
379 categories, GO:0009850 (auxin metabolic process) and GO:0009851 (auxin biosynthetic process),  
380 were enriched in only two parents, *A* and *R*.

381

## 382 4 Discussion

#### 383 4.1 Applicability of HomeoRoq to diverse ploidy levels

384 HomeoRoq was developed to classify genomic origins of RNA-Seq reads of allopolyploids  
385 consisting of two subgenomes (Akama et al., 2014), and has already been applied to *Arabidopsis*  
386 *kamchatica* ( $2n = 4x = 32$ ; HHLL), an allotetraploid between two diploids of *Arabidopsis halleri* ( $2n$   
387  $= 2x = 16$ ; HH) and *Arabidopsis lyrata* ( $2n = 2x = 16$ ; LL). Here, we successfully applied HomeoRoq  
388 to another species with a different ploidy level. The average proportions of the reads mapped on the  
389 wrong genome in *C. amara* and *C. rivularis* samples were  $1.1 \pm 0.1\%$  and  $1.2 \pm 0.1\%$ , respectively  
390 (**Dataset S2**). This high accuracy is comparable to the evaluation of the *A. kamchatica* data, 1.23%–  
391 1.64% (Akama et al., 2014; Kuo et al., 2020).

392 The proportion of *unclassified* reads in this study, which has the same matching rates on both  
393 parental genomes, was very close to that in the *A. kamchatica* study. In this study,  $11.5 \pm 2.0\%$  of  
394 reads in *C. insueta* samples were *unclassified* on average, compared to 11.0% in *A. kamchatica*  
395 (Akama et al., 2014), suggesting a similar divergence level between subgenomes in the two cases.  
396 Considering the percentage of unclassified reads and the low misclassification rate with diploid  
397 progenitors, HomeoRoq can be applied to genomes of any ploidy level providing that the genome  
398 consists of two types of subgenome.

#### 399 4.2 Total gene expression level of each subgenome is consistent with the chromosome number

400 The ratio of *A-origin* to *R-origin* reads in *C. insueta* was approximately 1:2. This result is consistent  
401 with the distribution of A-origin ratio showing a gentle peak at around 0.33 with a smooth decrease  
402 toward the edges (**Fig. 1**). This distribution indicates that expression ratios of most homeologs  
403 correlates with the copy number. A similar tendency could be found in other Brassicaceae  
404 allotetraploids (2, 5, 6). In the analysis of triploid banana ( $2n = 3x = 33$ ; ABB), a hybrid between  
405 *Musa acuminata* ( $2n = 2x = 22$ ; AA) and *M. balbisiana* ( $2n = 2x = 22$ ; BB), the read proportion is  
406 distributed around 0.66 for the B alleles by 155 homeologs with rather high expression level detected  
407 by LC-MSMS as isoforms (van Wesemael et al., 2018). This could also be seen in hexaploid bread  
408 wheat consisting of three subgenomes, where 70% of genes showed balanced expression among  
409 homeologs (Ramírez-González et al., 2018). So far, this consistency between ploidy number and  
410 expression ratio looks like a general rule in many species with some exceptions like tetraploid cotton  
411 (Yoo et al., 2013).



412 In addition to the majority of genes that show balanced expression between homeologs, a limited  
413 proportion of genes show significant differential expression. Even though a direct comparison among  
414 studies is difficult due to different thresholding policies, the number of genes with unbalanced  
415 homeolog expression tends to be the minor fraction in many quantitative studies. Further studies  
416 should show whether a similar pattern is observed in even higher ploidy levels or other odd ploidies.

### 417 **4.3 Limited number of homeolog pairs changed expression ratio in submergence condition**

418 Though the number of homeologs with unbalanced expression is smaller than that with balanced  
419 expression, they could play a significant role in speciation of polyploid species, especially for  
420 achieving a combined trait from progenitors. A series of studies have reported that homeolog  
421 expression ratios can be changed depending on external environments (Bardil et al., 2011; Dong and  
422 Adams, 2011; Akama et al., 2014; Paape et al., 2016). Akama *et al.* evaluated the changes of the  
423 homeolog expression ratio of *A. kamchatica* after cold treatment (Akama et al., 2014). They reported  
424 that the homeolog expression ratios before and after cold treatment were highly correlated ( $R_2 =$   
425 0.87), and only 1.11% of homeolog pairs statistically significantly changed in expression ratios in  
426 response to cold treatment (Akama et al., 2014). A similar result was reported for zinc treatment of *A.*  
427 *kamchatica*. The correlation of homeolog expression ratios between zinc treatment and control  
428 ranged from 0.89 to 0.94, and 0.3%–1.5% of homeologs significantly changed expression ratios after  
429 Zn treatment (Paape et al., 2016).

430 In this study using another Brassicaceae species, *C. insueta*, the correlation coefficients of A-origin  
431 ratios between 0 hr and the other time-points ranged from 0.68 to 0.82 (**Table S1**). The lowest  
432 correlation occurring between 2 hr and other time points may suggest that the initial reaction to the  
433 treatment had the strongest effect on gene expression. The overall high correlations among time  
434 points indicate that the expression ratios of most homeologs do not change considerably in response  
435 to treatment. Even though *C. rivularis* and *C. amara* show species-specific responses to  
436 submergence, leaf vivipary and submergence tolerance respectively, no specific expression  
437 preference or dominance of either progenitor was detected in the triploid. This suggests that  
438 transcriptional changes in only a limited number of homeologs, rather than genome-wide, might be  
439 responsible for the control of physiological change under submergence conditions.

### 440 **4.4 Triploid inherited advantageous traits from progenitors**

441 Only about 6% of the expressed genes were detected as VEH throughout the 96-hr treatment in each  
442 genome and subgenome, suggesting the criteria were fairly conservative. Among enriched GO  
443 categories are water stress related ones, particularly ethylene-response and fermentation.  
444 Fermentation metabolism in plants is important for submergence stress. We found more VEH genes  
445 in the fermentation-related categories in the diploid *C. amara* and the *amara*-derived subgenome of  
446 *C. insueta* than counterparts (Table 1). This suggests that *C. insueta* inherited the fermentation ability  
447 as a submergence response more largely from *C. amara* side. The ethylene signaling pathway should  
448 be stimulated in all three species as many related GO categories are found enriched in all VEH genes.  
449 However, the stress level seems to be variable according to the species as shown in the difference of  
450 enriched GO categories. In all of these ethylene related GO categories, *C. amara* had the strongest  
451 enrichment (i.e., highest number of VEH genes), and the enrichment in *amara*-derived subgenome  
452 was stronger than in *rivularis*-derived subgenome in *C. insueta*. These enrichment intensities should  
453 suggest that *C. amara* has higher acclimation ability to submergence through an activation of alcohol  
454 metabolic pathway and alteration in hormone signaling pathway and thus suffer from less oxidative  
455 stress as a result, as speculated by its habitat and a previous study (Shimizu-Inatsugi et al., 2016). In  
456 addition, in *C. insueta*, the contribution to the stress response of *IA* seems larger than that of *IR*, found  
457 as stronger enrichment in *IA* than in *IR*.

458 GO enrichment analysis with VEH genes also showed three GO categories related to meristem,  
459 GO:0035266 (meristem growth), GO:0010075 (regulation of meristem growth) and GO:0048509  
460 (meristem development). They were only enriched in the VEH sets of *IA* and *IR*, but not above the  
461 significance threshold in two parents, despite the fact that *C. rivularis* also produces plantlets on the  
462 leaf by the activation of ectopic meristems. This might imply that the ability to form ectopic plantlets  
463 in response to submergence is enhanced in the triploid *C. insueta* compared to the diploid *C.*  
464 *rivularis*. Considering the disadvantage in sexual reproduction due to the odd ploidy, effective  
465 vegetative propagation through plantlets might have been critically important for *C. insueta*.

466 The expression pattern of known key regulatory genes that function to maintain meristem activity  
467 showed two typical patterns, as shown in **Fig. 3** and **Fig S8**. Expression of these genes was  
468 upregulated in *C. rivularis* (*R*, **Fig. 3**) but not in *C. amara* (*A*, **Fig. 3**) in response to submergence.  
469 Expression of these genes was also upregulated in the *C. insueta* subgenome *IR*, but followed two  
470 different patterns in the *IA* subgenome. These patterns could be categorized as either non-induced,  
471 similar to *C. amara*, or induced, similar to *C. rivularis*, suggesting that non-induced homeologs could

472 be *cis*-regulated by *I<sub>A</sub>*, and induced homeologs could be *trans*-regulated by *I<sub>R</sub>*. One possibility is that  
473 this difference reflects the developmental timing of gene expression during meristem formation. For  
474 example, the *cis*-regulated genes *STM* and *CUC2* are expressed earlier during embryogenesis in *A.*  
475 *thaliana* than the *trans*-regulated genes *KNAT6* and *KNAT1/BP* (Hay and Tsiantis, 2010). This  
476 variation might imply a regulatory relationship among these genes in the gene regulatory network  
477 controlling plantlet formation in *C. insueta* leaves. This type of information might provide insights  
478 that warrant further study into the molecular mechanism of leaf vivipary in *C. rivularis* and *C.*  
479 *insueta*.

480

## 481 **5 Acknowledgments**

482 We would like to thank Walter Brücker for the support in the fieldwork in Urnerboden, Martin  
483 Lysak, Terezie Mandáková, Karol Marhold, Judita Zozomová-Lihová, Pamela Soltis and Douglas  
484 Soltis for discussion. Data analysis was partially performed on National Institute of Genetics (NIG)  
485 at Research Organization of Information and Systems (ROIS), Japan.

## 486 **6 Author Contributions**

487 JSun analysed data. JSun and RSI wrote the manuscript. RSI, AH, KKS and JSese refined the  
488 manuscript. HH performed experiment. AH, KKS, JSese supervised the project. All authors read,  
489 corrected, and approved the manuscript.

## 490 **7 Conflict of Interest**

491 The authors declare that the research was conducted in the absence of any commercial or financial  
492 relationships that could be construed as a potential conflict of interest.

## 493 **8 Contribution to the Field Statement**

494 In the research of genome evolution, a newborn species offers a unique and interesting case to study  
495 how the genome evolves during speciation and adaptation. A *Brassicaceae* plant, *Cardamine insueta*,  
496 which was born in a small village in Swiss Alps in the 20<sup>th</sup> century, applies to this. *C. insueta* is  
497 generated by the hybridization and genome duplication between two closely related progenitor  
498 species, which owned their respective habitats. This plant has adapted to a new habitat covering the  
499 intermediate area between the progenitor species. How could it achieve this in the course of  
500 speciation? The usage of the genes inherited from two progenitors should have the clue to answer this

501 question. We studied the gene expression pattern of *C. insueta* to analyze how it regulates the two  
502 types of the same gene inherited from its diploid progenitors, and found that it conserves the gene  
503 expression pattern of the advantageous progenitor according to different traits. For the trait of  
504 submergence tolerance, it exploits the pattern of one progenitor having the trait. For another trait,  
505 clonal propagation, it exploits the pattern of the other progenitor having this trait. This result  
506 contributes to our understanding of speciation, and how various genes are affected in a speciation  
507 process.

## 508 **9 Funding**

509 This study was funded by the Swiss National Science Foundation to RSI (Marie-Heim Högtlin grant)  
510 and KKS (31003A\_182318); by University Research Priority Programs, Evolution in Action of the  
511 University of Zurich to RSI and KKS; by the Human Frontier Science Program to KKS, AH, and  
512 JSese; by the Japan Science and Technology Agency, Core Research for Evolutionary Science and  
513 Technology grant number JPMJCR16O3, Japan; and by KAKENHI grant numbers 16H06469 to  
514 JSese, KKS, and JSun.

## 515 **10 References**

- 516 Abbott, R., Albach, D., Ansell, S., Arntzen, J. W., Baird, S. J. E., Bierne, N., et al. (2013).  
517 Hybridization and speciation. *J. Evol. Biol.* 26, 229–246. doi:10.1111/j.1420-9101.2012.02599.x
- 518 Abbott, R., and Andrew, J. (2004). Origins, establishment and evolution of new polyploid species:  
519 *Senecio cambrensis* and *S. eboracensis* in the British Isles. *Biol. J. Linn. Soc.* 82, 467–474.  
520 doi:10.1111/j.1095-8312.2004.00333.x
- 521 Abe, M., Takahashi, T., and Komeda, Y. (1999). Cloning and characterization of an L1 layer-specific  
522 gene in *Arabidopsis thaliana*. *Plant Cell Physiol.* 40, 571–580.  
523 doi:10.1093/oxfordjournals.pcp.a029579
- 524 Ainouche, M. L., Baumel, A., and Salmon, A. (2004). *Spartina anglica* C. E. Hubbard: a natural  
525 model system for analysing early evolutionary changes that affect allopolyploid genomes. *Biol.*  
526 *J. Linn. Soc.* 82, 475–484. doi:10.1111/j.1095-8312.2004.00334.x
- 527 Akama, S., Shimizu-Inatsugi, R., Shimizu, K. K., and Sese, J. (2014). Genome-wide quantification of  
528 homeolog expression ratio revealed nonstochastic gene regulation in synthetic allopolyploid  
529 *Arabidopsis*. *Nucleic Acids Res.* 42, 1–15. doi:10.1093/nar/gkt1376
- 530 Akiyama, R., Sun, J., Hatakeyama, M., Lischer, H. E. L., Briskine, R. V., Hay, A., et al. (2019).  
531 Fine-scale ecological and transcriptomic data reveal niche differentiation of an allopolyploid  
532 from diploid parents in *Cardamine*. *bioRxiv*, 600783. doi:10.1101/600783

- 533 Alabadí, D., Oyama, T., Yanovsky, M. J., Harmon, F. G., Más, P., and Kay, S. A. (2001). Reciprocal  
534 regulation between TOC1 and LHY/CCA1 within the *Arabidopsis* circadian clock. *Science* 293,  
535 880–883. doi:10.1126/science.1061320
- 536 Bardil, A., de Almeida, J. D., Combes, M. C., Lashermes, P., and Bertrand, B. (2011). Genomic  
537 expression dominance in the natural allopolyploid *Coffea arabica* is massively affected by  
538 growth temperature. *New Phytol.* 192, 760–774. doi:10.1111/j.1469-8137.2011.03833.x
- 539 Bolger, A. M., Lohse, M., and Usadel, B. (2014). Trimmomatic: A flexible trimmer for Illumina  
540 sequence data. *Bioinformatics* 30, 2114–2120. doi:10.1093/bioinformatics/btu170
- 541 Bretagnolle, F., and Thompson J. D. (1995). Gametes with the somatic chromosome number:  
542 mechanisms of their formation and role in the evolution of autopolyploid plants. *New Phytol.*  
543 129, 1–22. doi:10.1111/j.1469-8137.1995.tb03005.x
- 544 Chao, Q., Rothenberg, M., Solano, R., Roman, G., Terzaghi, W., and Ecker†, J. R. (1997). Activation  
545 of the ethylene gas response pathway in *Arabidopsis* by the nuclear protein ETHYLENE-  
546 INSENSITIVE3 and related proteins. *Cell* 89, 1133–1144. doi:10.1016/S0092-8674(00)80300-1
- 547 Chuck, G., Lincoln, C., and Hake, S. (1996). *KNAT1* induces lobed leaves with ectopic meristems  
548 when overexpressed in *Arabidopsis*. *Plant Cell* 8, 1277–1289. doi:10.1105/tpc.8.8.1277
- 549 Comai, L. (2005). The advantages and disadvantages of being polyploid. *Nat. Rev. Genet.* 6, 836–  
550 846. doi:10.1038/nrg1711
- 551 Czechowski, T., Stitt, M., Altmann, T., and Udvardi, M. K. (2005). Genome-wide identification and  
552 testing of superior reference genes for transcript normalization. *Society* 139, 5–17.  
553 doi:10.1104/pp.105.063743.1
- 554 Dickinson, T. A. (1978). Epiphyly in angiosperms. *Bot. Rev.* 44, 181–232. doi:10.1007/BF02919079
- 555 Dobin, A., Davis, C. A., Schlesinger, F., Drenkow, J., Zaleski, C., Jha, S., et al. (2013). STAR:  
556 ultrafast universal RNA-seq aligner. *Bioinformatics* 29, 15–21.  
557 doi:10.1093/bioinformatics/bts635
- 558 Dong, S., and Adams, K. L. (2011). Differential contributions to the transcriptome of duplicated  
559 genes in response to abiotic stresses in natural and synthetic polyploids. *New Phytol.* 190, 1045–  
560 1057. doi:10.1111/j.1469-8137.2011.03650.x
- 561 Drisch, R. C., and Stahl, Y. (2015). Function and regulation of transcription factors involved in root  
562 apical meristem and stem cell maintenance. *Front. Plant Sci.* 6, 1–8.  
563 doi:10.3389/fpls.2015.00505
- 564 Gan, X., Hay, A., Kwantes, M., Haberer, G., Hallab, A., Ioio, R. Dello, et al. (2016). The *Cardamine*  
565 *hirsuta* genome offers insight into the evolution of morphological diversity. *Nat. plants* 2,  
566 16167. doi:10.1038/nplants.2016.167
- 567 Garcês, H. M. P., Champagne, C. E. M., Townsley, B. T., Park, S., Malhó, R., Pedroso, M. C., et al.  
568 (2007). Evolution of asexual reproduction in leaves of the genus *Kalanchoë*. *Proc. Natl. Acad.*  
569 *Sci. U. S. A.* 104, 15578–15583. doi:10.1073/pnas.0704105104

- 570 Hay, A., and Tsiantis, M. (2010). KNOX genes: versatile regulators of plant development and  
571 diversity. *Development* 137, 3153–3165. doi:10.1242/dev.030049
- 572 Howard, H. W. (1948). Chromosome number of *Cardamine pratensis*. *Nature* 161, 277–277.  
573 doi:10.1038/161277a0
- 574 Husband, B. C. (2004). The role of triploid hybrids in the evolutionary dynamics of mixed-ploidy  
575 populations. *Biol. J. Linn. Soc.* 82, 537–546. doi:10.1111/j.1095-8312.2004.00339.x
- 576 Hussein, F. (1948). Chromosome number of *Cardamine pratensis*. *Nature* 161, 1015–1015.  
577 doi:10.1038/1611015a0
- 578 Jerry A, C., and H. Allen, O. (2004). Speciation. Sunderland, Mass: Sinauer Associates
- 579 Kuo, T. C. Y., Hatakeyama, M., Tameshige, T., Shimizu, K. K., and Sese, J. (2020). Homeolog  
580 expression quantification methods for allopolyploids. *Brief. Bioinform.* 21, 395–407.  
581 doi:10.1093/bib/bby121
- 582 Li, H., Handsaker, B., Wysoker, A., Fennell, T., Ruan, J., Homer, N., et al. (2009). The Sequence  
583 Alignment/Map format and SAMtools. *Bioinformatics* 25, 2078–2079.  
584 doi:10.1093/bioinformatics/btp352
- 585 Long, J. A., Moan, E. I., Medford, J. I., and Barton, M. K. (1996). A member of the KNOTTED class  
586 of homeodomain proteins encoded by the *STM* gene of *Arabidopsis*. *Nature* 379, 66–69.  
587 doi:10.1038/379066a0
- 588 Mable, B. K. (2003). Breaking down taxonomic barriers in polyploidy research. *Trends Plant Sci.* 8,  
589 582–590. doi:10.1016/j.tplants.2003.10.006
- 590 Mandáková, T., Kovařík, A., Zozomová-Lihová, J., Shimizu-Inatsugi, R., Shimizu, K. K.,  
591 Mummenhoff, K., et al. (2013). The More the Merrier: Recent Hybridization and Polyploidy in  
592 *Cardamine*. *Plant Cell* 25, 3280–3295. doi:10.1105/tpc.113.114405
- 593 Mandáková, T., Marhold, K., and Lysak, M. A. (2014). The widespread crucifer species *Cardamine*  
594 *flexuosa* is an allotetraploid with a conserved subgenomic structure. *New Phytol.* 201, 982–992.  
595 doi:10.1111/nph.12567
- 596 Mason, A. S., and Pires, J. C. (2015). Unreduced gametes: Meiotic mishap or evolutionary  
597 mechanism? *Trends Genet.* 31, 5–10. doi:10.1016/j.tig.2014.09.011
- 598 Paape, T., Hatakeyama, M., Shimizu-Inatsugi, R., Cereghetti, T., Onda, Y., Kenta, T., et al. (2016).  
599 Conserved but attenuated parental gene expression in allopolyploids: constitutive zinc  
600 hyperaccumulation in the allotetraploid *Arabidopsis kamchatica*. *Mol. Biol. Evol.* 33, 2781–  
601 2800. doi:10.1093/molbev/msw141
- 602 Planet, E., Attolini, C. S. O., Reina, O., Flores, O., and Rossell, D. (2012). htSeqTools: High-  
603 throughput sequencing quality control, processing and visualization in R. *Bioinformatics* 28,  
604 589–590. doi:10.1093/bioinformatics/btr700
- 605 Ramírez-González, R. H., Borrill, P., Lang, D., Harrington, S. A., Brinton, J., Venturini, L., et al.



- 606 (2018). The transcriptional landscape of polyploid wheat. *Science* 361, eaar6089.  
607 doi:10.1126/science.aar6089
- 608 Ramsey, J., and Schemske, D. W. (1998). Pathways, mechanisms, and rates of polyploid formation in  
609 flowering plants. *Annu. Rev. Ecol. Syst.* 29, 467–501. doi:10.1146/annurev.ecolsys.29.1.467
- 610 Rossmann, S., Kohlen, W., Hasson, A., and Theres, K. (2015). Lateral suppressor and Goblet act in  
611 hierarchical order to regulate ectopic meristem formation at the base of tomato leaflets. *Plant J.*  
612 81, 837–848. doi:10.1111/tpj.12782
- 613 Salisbury, E. J. (1965). The reproduction of *Cardamine pratensis* L. and *Cardamine palustris*  
614 Peterman particularly in relation to their specialized foliar vivipary, and its deflexion of the  
615 constraints of natural selection. *Proc. R. Soc. London. Ser. B. Biol. Sci.* 163, 321–342.  
616 doi:10.1098/rspb.1965.0072
- 617 Sarkar, A. K., Luijten, M., Miyashima, S., Lenhard, M., Hashimoto, T., Nakajima, K., et al. (2007).  
618 Conserved factors regulate signalling in *Arabidopsis thaliana* shoot and root stem cell  
619 organizers. *Nature* 446, 811–814. doi:10.1038/nature05703
- 620 Shimizu-Inatsugi, R., Terada, A., Hirose, K., Kudoh, H., Sese, J., and Shimizu, K. K. (2016). Plant  
621 adaptive radiation mediated by polyploid plasticity in transcriptomes. *Mol. Ecol.* 26, 193–207.  
622 doi:10.1111/mec.13738
- 623 Shin, H., Shannon, C. P., Fishbane, N., Ruan, J., Zhou, M., Balshaw, R., et al. (2014). Variation in  
624 RNA-Seq transcriptome profiles of peripheral whole blood from healthy individuals with and  
625 without globin depletion. *PLoS One* 9, 1–11. doi:10.1371/journal.pone.0091041
- 626 Smith, J. E. (1825). English Flora. III. Flora.
- 627 Solano, R., Stepanova, A., Chao, Q., and Ecker, J. R. (1998). Nuclear events in ethylene signaling: a  
628 transcriptional cascade mediated by ETHYLENE-INSENSITIVE3 and ETHYLENE-  
629 RESPONSE-FACTOR1. *Genes Dev.* 12, 3703–14. doi:10.1101/gad.12.23.3703
- 630 Soltis, D. E., Soltis, P. S., Pires, J. C., Kovarik, A., Tate, J. A., and Mavrodiev, E. (2004). Recent and  
631 recurrent polyploidy in *Tragopogon* (Asteraceae): cytogenetic, genomic and genetic  
632 comparisons. *Biol. J. Linn. Soc.* 82, 485–501. doi:10.1111/j.1095-8312.2004.00335.x
- 633 Soltis, P. S., and Soltis, D. E. (2009). The role of hybridization in plant speciation. *Annu. Rev. Plant*  
634 *Biol.* 60, 561–588. doi:10.1146/annurev.arplant.043008.092039
- 635 Tayalé, A., and Parisod, C. (2013). Natural pathways to polyploidy in plants and consequences for  
636 genome reorganization. *Cytogenet. Genome Res.* 140, 79–96. doi:10.1159/000351318
- 637 Urbanska-Worytkiewicz, K., and Landolt, E. (1974a). Biosystematic investigations in *Cardamine*  
638 *pratensis* L.s.I. I. Diploid taxa from Central Europe and their fertility relationships. *Berichte des*  
639 *Geobot. Instituts der ETH Stift. Rübel* 42, 42–139
- 640 Urbanska-Worytkiewicz, K., and Landolt, E. (1974b). Hybridation naturelle entre *Cardamine*  
641 *rivularis* SCHUR et *C. amara* L., ses aspects cytologiques et écologiques. *Act. Soc. Helv. Sci.*  
642 *Nat.*, 89–90

- 643 Urbanska, K. M. (1977). Reproduction in natural triploid hybrids ( $2n=24$ ) between *Cardamine*  
644 *rivularis* Schur and *C. amara* L. *er. Geobot. Inst. ETH Stift. Rubel* 44, 42–85
- 645 Urbanska, K. M., Hurka, H., Landolt, E., Neuffer, B., and Mummenhoff, K. (1997). Hybridization  
646 and evolution in *Cardamine* (*Brassicaceae*) at Urnerboden, Central Switzerland: Biosystematic  
647 and molecular evidence. *Plant Syst. Evol.* 204, 233–256. doi:10.1007/BF00989208
- 648 Urbaska-Worytkiewicz, K., and Landolt, E. (1972). Natürliche Bastarde zwischen *Cardamine amara*  
649 *L.* und *C. rivularis* Schur aus den Schweizer Alpen. *Ber. Geobot. Inst. ETH. Stift. Rübel* 41,  
650 88–101. doi:10.5169/seals-377675
- 651 van Wesemael, J., Hueber, Y., Kissel, E., Campos, N., Swennen, R., and Carpentier, S. (2018).  
652 Homeolog expression analysis in an allotriploid non-model crop via integration of  
653 transcriptomics and proteomics. *Sci. Rep.* 8, 1353. doi:10.1038/s41598-018-19684-5
- 654 Vollbrecht, E., Veit, B., Sinha, N., and Hake, S. (1991). The developmental gene *Knotted-1* is a  
655 member of a maize homeobox gene family. *Nature* 350, 241–243. doi:10.1038/350241a0
- 656 Williams, R. W. (1998). Plant homeobox genes: many functions stem from a common motif.  
657 *BioEssays* 20, 280–282. doi:10.1002/(SICI)1521-1878(199804)20:4<280::AID-  
658 BIES2>3.0.CO;2-U
- 659 Yamaguchi, R., Imoto, S., Yamauchi, M., Nagasaki, M., Yoshida, R., Shimamura, T., et al. (2008).  
660 Predicting differences in gene regulatory systems by state space models. *Genome Inform.* 21,  
661 101–113. doi:10.11234/gi1990.21.101
- 662 Yoo, M.-J., Szadkowski, E., and Wendel, J. F. (2013). Homoeolog expression bias and expression  
663 level dominance in allopolyploid cotton. *Heredity (Edinb.)*. 110, 171–180.  
664 doi:10.1038/hdy.2012.94
- 665 Yu, G., Wang, L.-G., Han, Y., and He, Q.-Y. (2012). clusterProfiler: an R Package for Comparing  
666 Biological Themes Among Gene Clusters. *Omi. A J. Integr. Biol.* 16, 284–287.  
667 doi:10.1089/omi.2011.0118
- 668 Zhao, J., Yang, F., Feng, J., Wang, Y., Lachenbruch, B., Wang, J., et al. (2017). Genome-wide  
669 constitutively expressed gene analysis and new reference gene selection based on transcriptome  
670 data: a case study from poplar/canker disease interaction. *Front. Plant Sci.* 8, 1–13.  
671 doi:10.3389/fpls.2017.01876
- 672 Zozomová-Lihová, J., Krak, K., Mandáková, T., Shimizu, K. K., Španiel, S., Vít, P., et al. (2014).  
673 Multiple hybridization events in *Cardamine* (*Brassicaceae*) during the last 150 years: revisiting  
674 a textbook example of neoallopolyploidy. *Ann. Bot.* 113, 817–830. doi:10.1093/aob/mcu012

675

676

677 **11 Table**

Table 1 The negative log<sub>10</sub>(q-value) of the enriched GO categories in each VEH set described in the manuscript. This data is the extract from the list of all enriched GOs (Dataset S4). ND means that the category was not detected as enriched by the threshold FDR = 0.1.

| Keyword          | Accession  | VEH set |                |                |     | GO Name                                                 |
|------------------|------------|---------|----------------|----------------|-----|---------------------------------------------------------|
|                  |            | A       | I <sub>A</sub> | I <sub>R</sub> | R   |                                                         |
| Alcohol          | GO:0006066 | 6.9     | 5.2            | 2.7            | 2.0 | alcohol metabolic process                               |
|                  | GO:0046165 | 6.4     | 6.4            | 4.4            | 2.7 | alcohol biosynthetic process                            |
| Water            | GO:0009414 | 3.9     | 3.3            | 5.1            | 7.3 | response to water deprivation                           |
| Ethylene         | GO:0009723 | 7.9     | 3.6            | 2.8            | 7.5 | response to ethylene                                    |
|                  | GO:0009873 | 6.1     | 1.5            | ND             | 2.5 | ethylene-activated signaling pathway                    |
|                  | GO:0071369 | 6.1     | 1.3            | ND             | 2.3 | cellular response to ethylene stimulus                  |
|                  | GO:0009692 | 2.6     | ND             | ND             | ND  | ethylene metabolic process                              |
|                  | GO:0009693 | 2.6     | ND             | ND             | ND  | ethylene biosynthetic process                           |
| Abscisic acid    | GO:0009738 | 1.4     | ND             | ND             | ND  | abscisic acid-activated signaling pathway               |
|                  | GO:0071215 | 1.4     | ND             | ND             | ND  | cellular response to abscisic acid stimulus             |
| Oxidative stress | GO:0006979 | 1.9     | ND             | ND             | 2.6 | response to oxidative stress                            |
|                  | GO:0042743 | ND      | ND             | ND             | 3.0 | hydrogen peroxide metabolic process                     |
|                  | GO:2000377 | ND      | 1.6            | 1.5            | 5.6 | regulation of reactive oxygen species metabolic process |
|                  | GO:0010310 | ND      | 1.3            | 1.1            | 5.1 | regulation of hydrogen peroxide metabolic process       |
| Meristem         | GO:0035266 | ND      | 3.1            | 1.9            | ND  | meristem growth                                         |
|                  | GO:0010075 | ND      | 3.4            | 2.0            | ND  | regulation of meristem growth                           |
|                  | GO:0048509 | ND      | 2.8            | 1.8            | ND  | regulation of meristem development                      |

678

679

## 680 12 Supplementary Material

681 Supplementary\_Material.pdf (Table S1, Fig. S1 to Fig. S8)

682 **SI dataset 1** Videos for visualizing of plantlet initiation of *C. insueta* Video file (MP4) visualizes the  
 683 plantlet initiation of *C. insueta* at the incubator under the standard condition with the 16 hr light and  
 684 8 hr dark. Leaflet were detached form *C. insueta* individuals and floated on the water in a beaker.  
 685 Photos were taken between May 16, 2018 and June 7, 2018, with 90 minutes intervals. Photos taken  
 686 at daylight were concatenated into video.

687 **SI dataset 2** Statistics of RNA-Seq data processing An Excel format file that contains the statistics of  
 688 RNA-Seq data processing with HomeoRoq pipeline. Sheet 1: Number of read pairs before and after  
 689 quality controls with Trimmomatic; Sheet 2: Number of reads that were mapped onto A-genome and  
 690 R-genome, and number of reads that were classified into A-origin, R-origin, and unclassified reads  
 691 with HomeoRoq.

692 **SI dataset 3** FPKM and CV of variably expressed homeologs An Excel format file that contains gene  
693 names, averages of log<sub>10</sub>-transformed FPKM, and coefficient of variation (CV) of log<sub>10</sub>-  
694 transformed FPKM of variably expressed homeologs (VEHs). Sheet 1: VEHs of IA samples; Sheet 2:  
695 VEHs of IR samples; Sheet 3: VEHs of *C. amara* samples; Sheet 4: VEHs of *C. rivularis* samples.

696 **SI dataset 4** Enriched GO terms of variably expressed homeologs An Excel format file that contains  
697 gene ontology (GO) enrichment analysis results of VEHs. Sheet 1: Summarization of GO enrichment  
698 analysis results. Values in cells represent negative log<sub>10</sub>(q-value); Sheet IA: GO enrichment analysis  
699 result of VEHs of IA samples; Sheet IR: GO enrichment analysis result of VEHs of IR samples; Sheet  
700 A: GO enrichment analysis result of VEHs of *C. amara* samples; Sheet R: GO enrichment analysis  
701 result of VEHs of *C. rivularis* samples.

702 **SI dataset 5** Relative gene expression levels of the genes of the category GO:0009414 (response to  
703 water deprivation).

### 704 **13 Data Availability Statement**

705 The datasets generated for this study can be found in DNA Data Bank of Japan (DDBJ) Sequence  
706 Read Archive (DRA), [www.ddbj.nig.ac.jp](http://www.ddbj.nig.ac.jp) [accession no. PRJDB9426].

### 707 **14 Figure Legends**

708 **Figure 1** Comparison of homeolog expression from A- and R-subgenomes. **A** Expression ratio  
709 between A- and R-homeologs before submergence treatment in the triploid *C. insueta*. Each dot  
710 shows the relation between the log<sub>10</sub>-transformed A-origin and R-origin read of a homeolog pair at  
711 0hr point. Only the homeolog pairs with FPKM > 1.0 in either IA or IR samples are shown. The red  
712 line represents the ratio A:R=1:1, and the orange line represents the ratio A:R=1:2. **B** Comparison of  
713 A-origin ratios between two time points, 0 hr and 2 hr, in the triploid *C. insueta*. Each point shows  
714 the A-origin ratios of a homeolog pair at 0 hr and 2 hr. The orange lines represent the position of A-  
715 origin=0.33 at each time point.

716

717

718 **Figure 2** Principal component analysis of the expressed homeologs/genes in *C. insueta* (IA), *C.*  
719 *insueta* (IR), *C. amara* (A) and *C. rivularis* (R) samples at 9 time points. PCA was performed against  
720 log<sub>10</sub>-transformed FPKM of 21,131 expressed homeologs. The two plots show the relation between  
721 PC1-PC2 (**A**) and PC2-PC3 (**B**). The colors represent genome/subgenome, and the numbers represent  
722 the time points after the start of submergence treatment.

723 **Figure 3** A schematic drawing of *cis*- and *trans*-regulation of key regulatory genes in meristem  
724 formation. The expression patterns of IA homeologs are arbitrary categorized to *cis*- or *trans*-  
725 regulated according to the expression pattern of each homeolog. See Figure S8 for their original  
726 temporal expression patterns.

727

728

729

730

731

732

733



**A**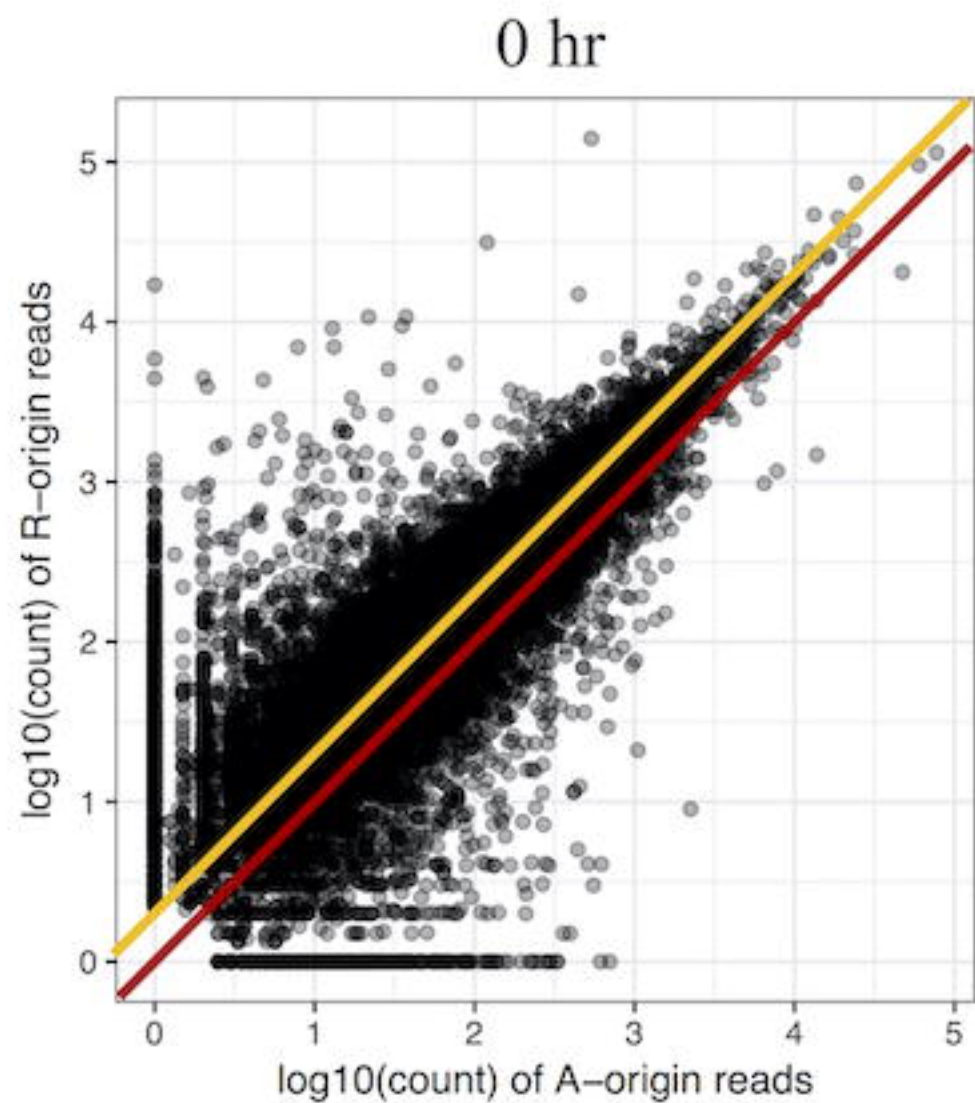**B**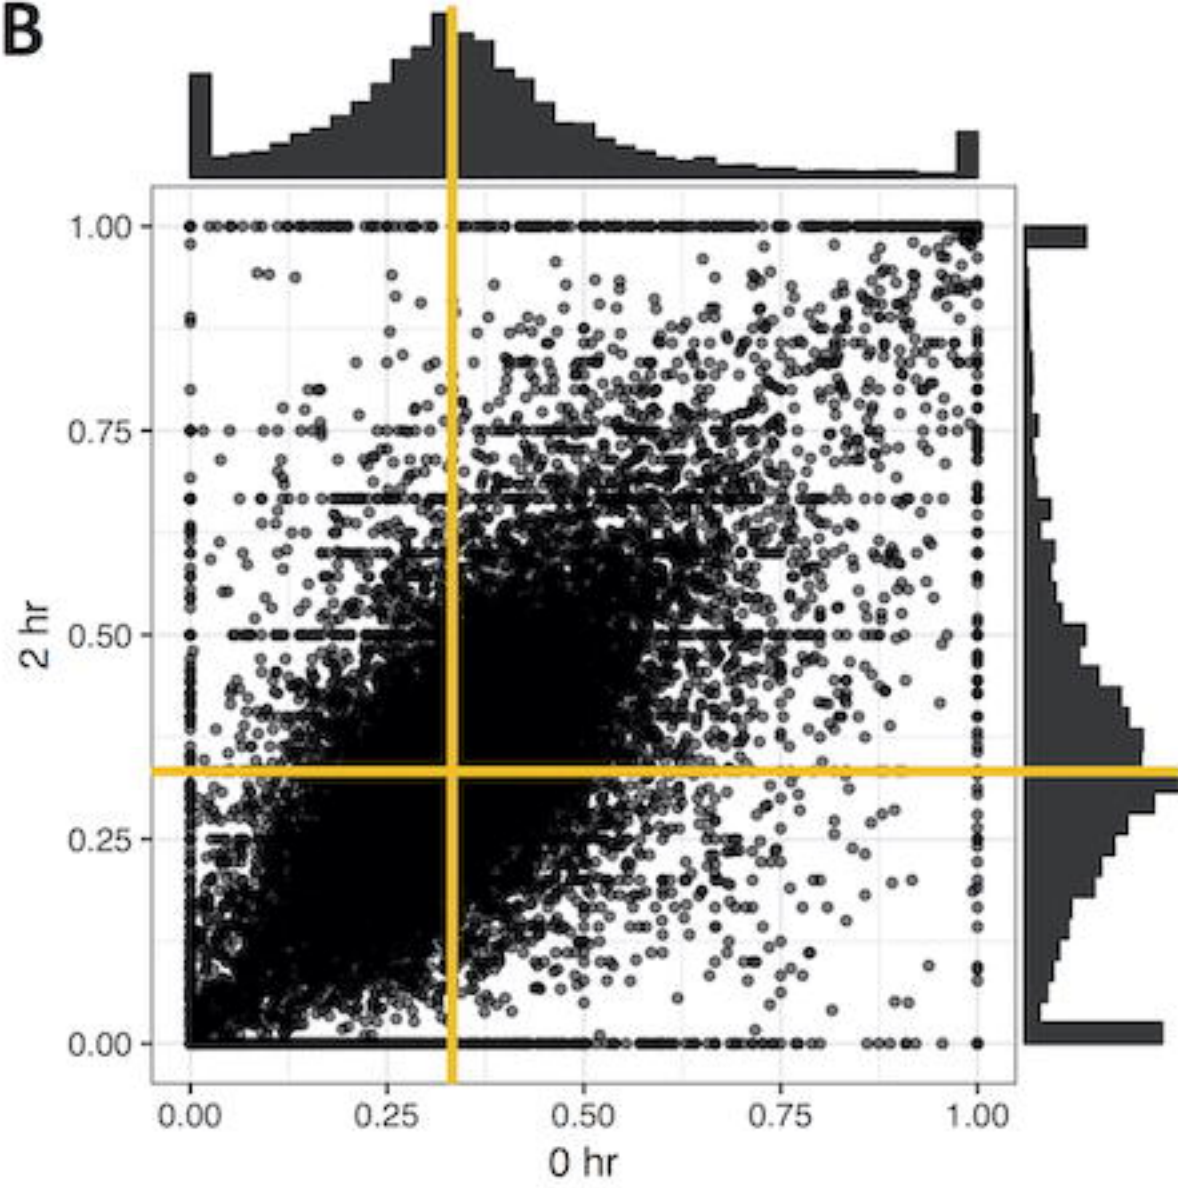



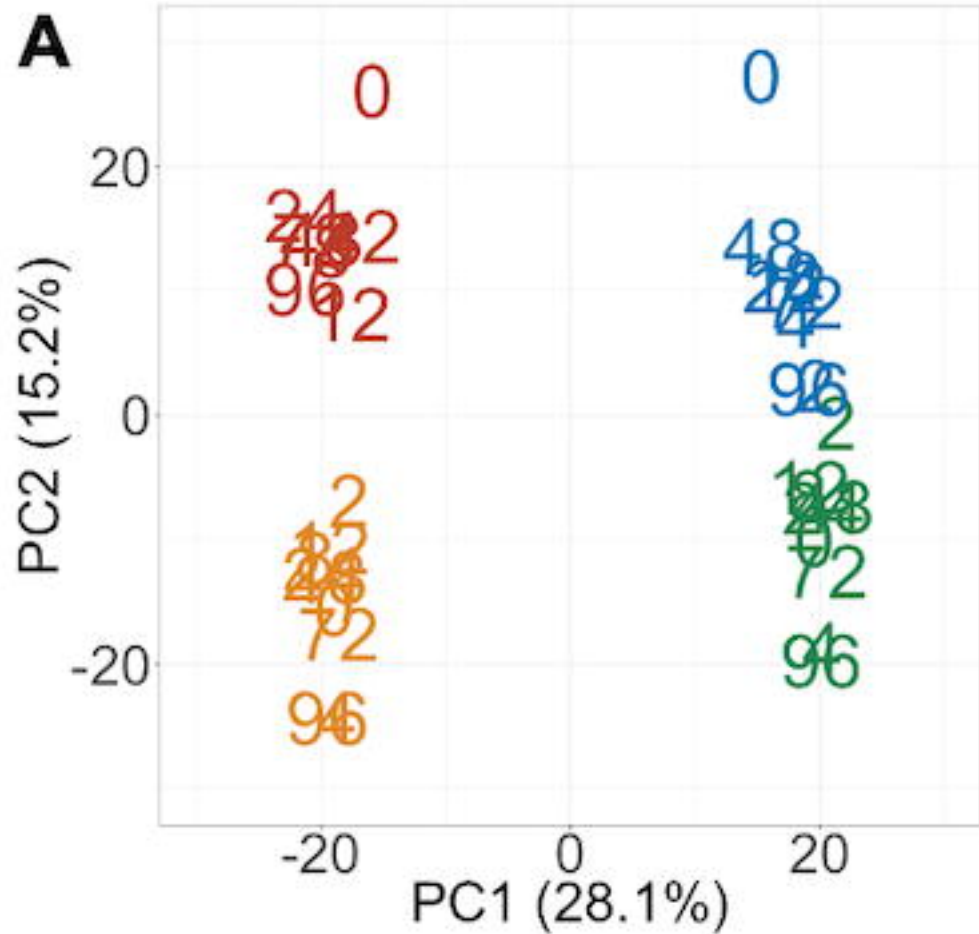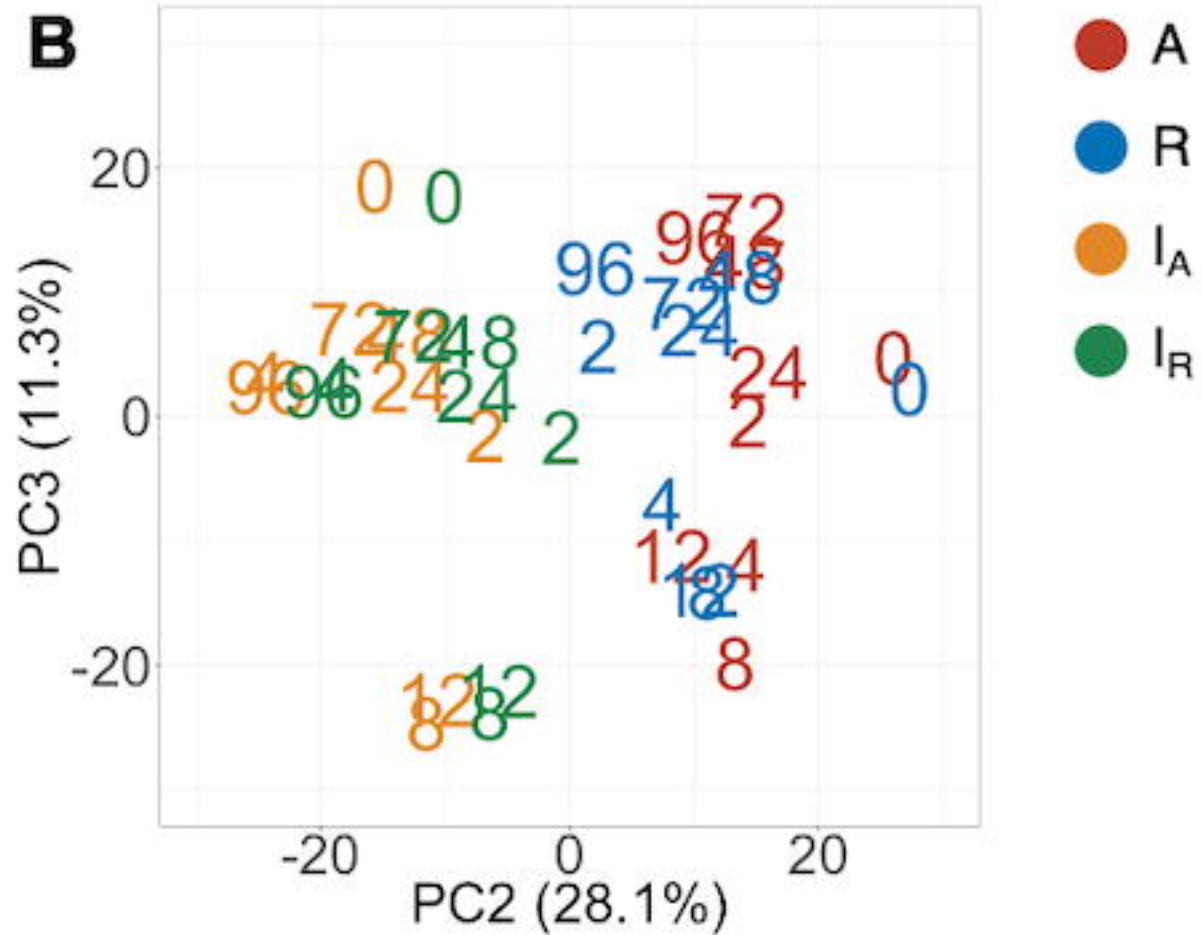

**A** $I_A$  $I_R$ **R**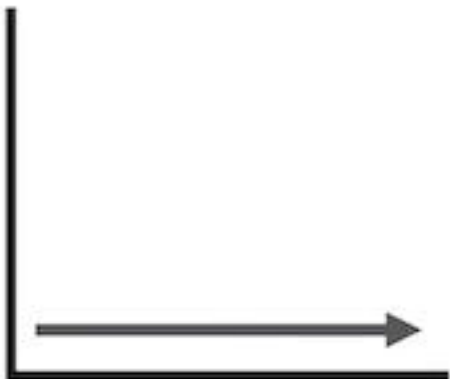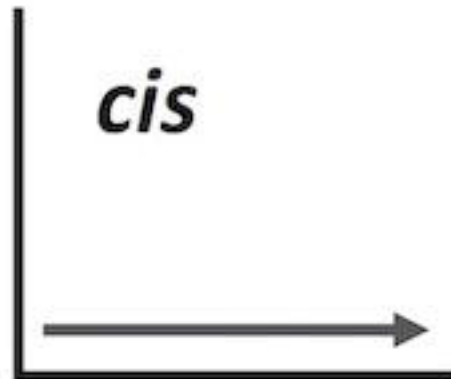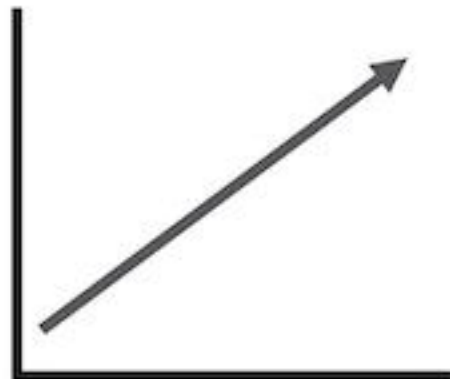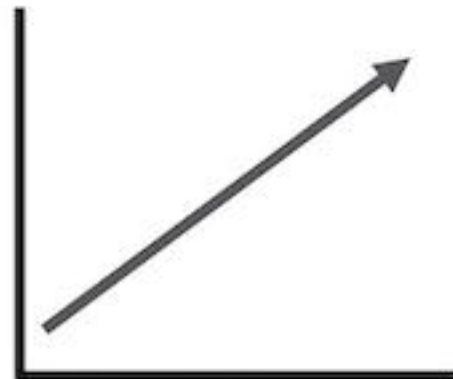

*STM/BUM*  
*KNAT2*  
*CUC2/3*  
*PLT1/2/3*

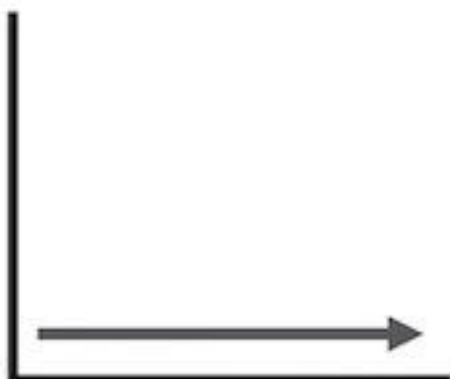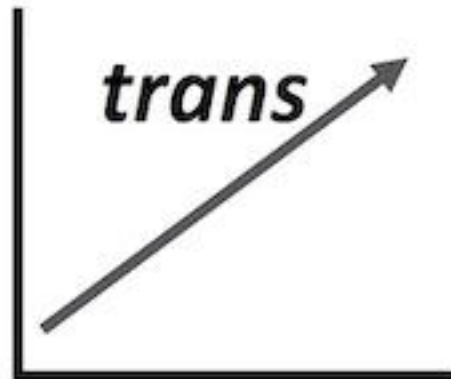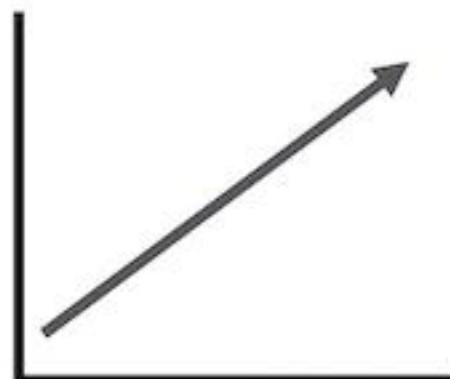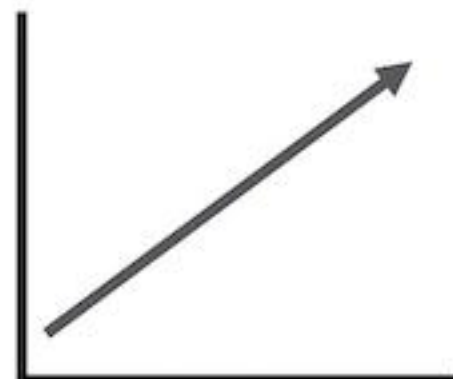

*KNAT1/BP*  
*KNAT6*  
*LAS*  
*PDF1*  
*BBM*
